# Supplementary material for: Silencing of Parkinson's disease-associated genes with artificial mirtron mimics of miR-1224
Source: PubMed Central journal article supplement — Nucleic Acids Res. 2012 Jul 30;40(19):9863–75. doi: 10.1093/nar/gks712 (PMC3479180; doi:10.1093/nar/gks712), 2012-07-30
Supplement: supp_gks712_nar-02419-a-2011-File007.pdf [file supp_gks712_nar-02419-a-2011-File007.pdf]

**Fig. S1 pre-miR-LRRK2-5 and pre-miR-LRRK2-5NB direct silencing of a complementary dual-luciferase target sequence** A) Dual-luciferase reporter assay showing knockdown of LRRK2 target sequence following co-transfection with indicated pre-miRNA variants. Values represent mean ratios of *Renilla*:Firefly luciferase +/- S.D. from n=6. Pre-miRNA variants are normalised to cells transfected with a non-specific U6 pre-miRNA hairpin. \*= P<0.05 relative to normalising control.

**Fig. S2 mirt-LRRK2-5NB directs silencing in a sequence-specific manner** A) Codon-modified scrambled target sequence to mirt-LRRK2-5NB. B) Dual-luciferase reporter assays showing knockdown of a codon-modified scrambled LRRK2 target following co-transfection with indicated mirtron (left panel) and pre-miRNA control (right panel) variants. Values represent mean ratios of *Renilla*:Firefly luciferase +/- S.D. from n=6. Mirtron variants are normalized to cells transfected with the NAD variant. Pre-miRNA variants are normalised to cells transfected with a non-specific U6 pre-miRNA hairpin. \*= P<0.05 relative to respective normalising control.

**Fig. S3 Direct comparison of synthetic mirtrons to U6-transcribed pre-miRNAs (shRNAs)** A) Dual-luciferase reporter assays showing knockdown of a LRRK2 target following co-transfection with indicated mirtron (left panel) and pre-miRNA control (right panel) variants at equivalent hairpin concentrations of 2.5 fm. Values represent mean ratios of *Renilla*:Firefly luciferase +/- S.D. from n=3. Mirtron variants are normalized to cells transfected with the NAD variant. Pre-miRNA variants are normalised to cells transfected with a non-specific U6 pre-miRNA hairpin. \*= P<0.05 relative to respective normalising control.

**Fig. S4 Algorithm design of a synthetic mirtron targeting  $\alpha$ -synuclein.** A) Predicted hairpin alignments of  $\alpha$ -synuclein targeting synthetic mirtron,  $\alpha$ -syn-mirt-1, designed using an in-house algorithm. B) Representative fluorescent microscopy images of different intron variants 48hrs after transfection in HEK-293 cells. C) Quantification of eGFP fluorescence following expression indicated intron variants in HEK-293 cells. Values represent mean fluorescence +/- S.D. from n=3. \*= P<0.05 relative to non-transfected cells. D) Dual-luciferase reporter assays showing

knockdown of an  $\alpha$ -synuclein target following co-transfection with indicated mirtron (left panel) and pre-miRNA control (right panel) variants. Values represent mean ratios of *Renilla*:Firefly luciferase  $\pm$  S.D. from n=3. Mirtron variants are normalized to cells transfected with the NAD variant. Pre-miRNA variants are normalised to cells transfected with a non-specific U6 pre-miRNA hairpin. \*= P<0.05 relative to respective normalising control. E) Quantification of mCherry tagged  $\alpha$ -synuclein fluorescence following co-expression with the NAD intron or mirt- $\alpha$ -Syn-1 in HEK-293 cells. Values represent mean fluorescence  $\pm$  S.D. from n=3. Mirt- $\alpha$ -Syn-1 fluorescence is normalized to cells transfected with the NAD intron. \*= P<0.05 relative to respective normalising control.

**Fig. S5** A) Quantification of eGFP fluorescence following expression of indicated intron variants in SH-SY5Y cells and Hela cells. Values represent mean fluorescence  $\pm$  S.D. from n=3. \*= P<0.05 relative to non-transfected cells.

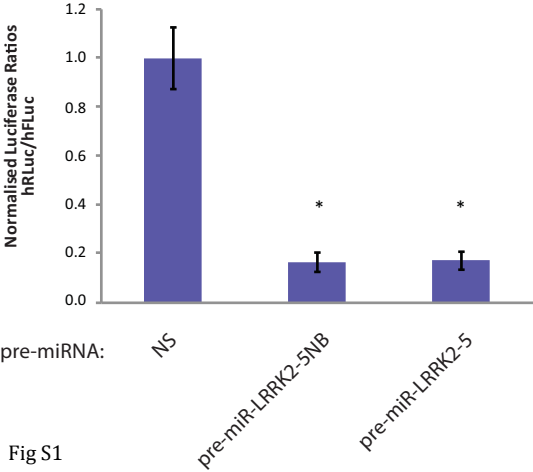

A.

LRRK2 sequence: acc t t t att cct gac tct tct atg

Amino-acid seq: Thr Phe Ile Pro Asp Ser Ser Met

Codon replaced: acG ttC atC ccG gaT tcG tcG atg

B.

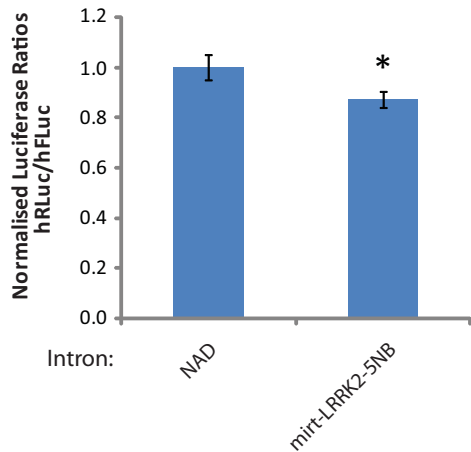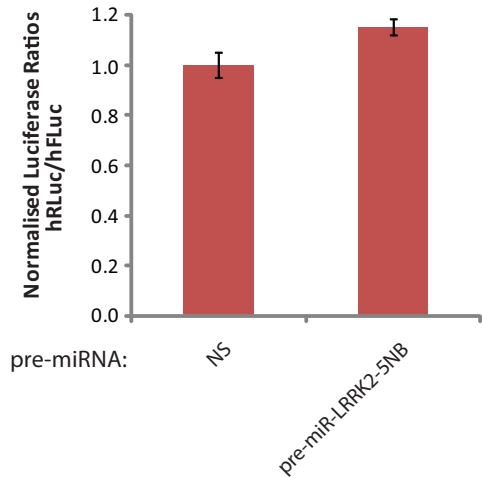

Fig S2

A.

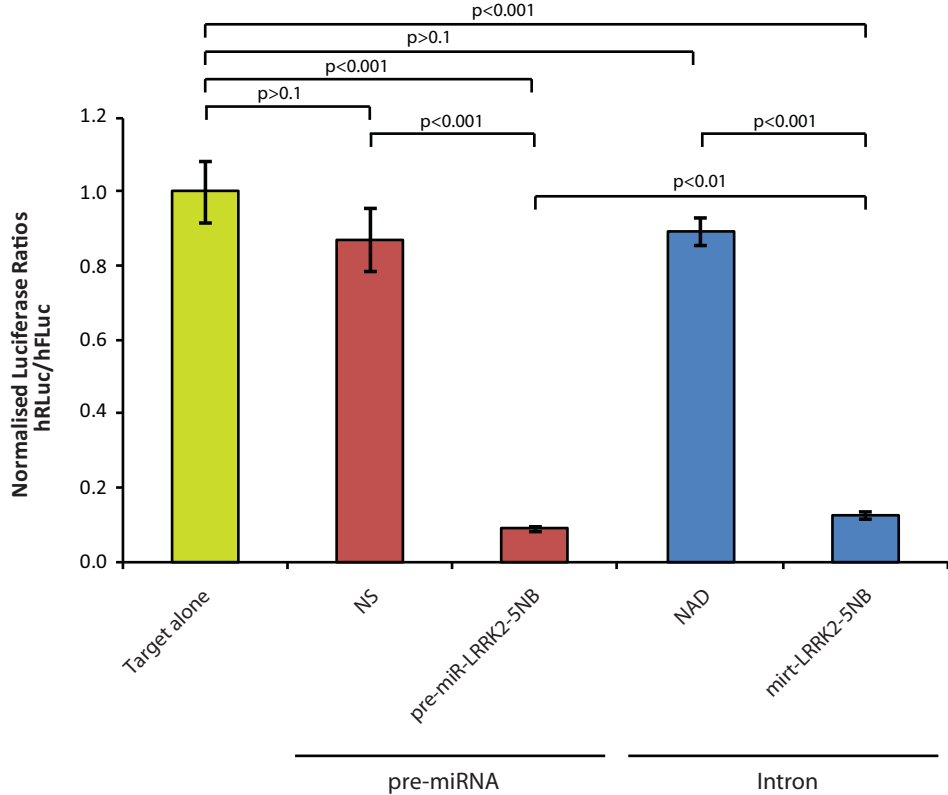

Fig S3

A.

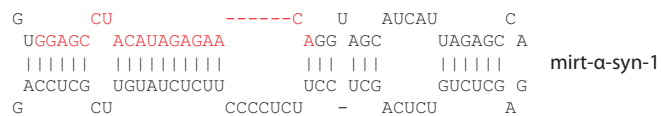

B.

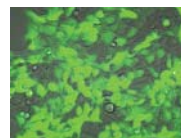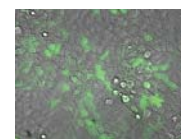

C.

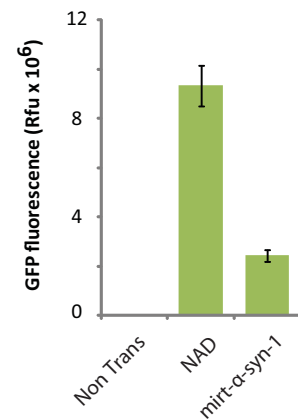

D.

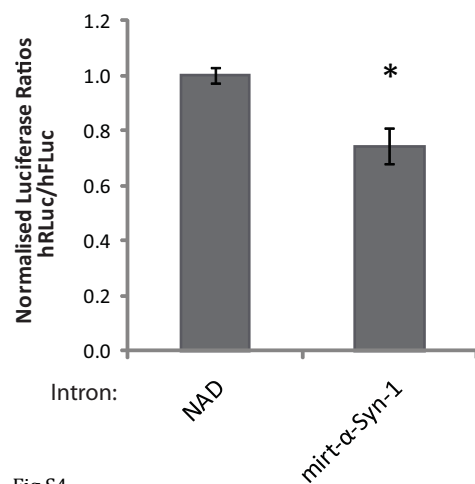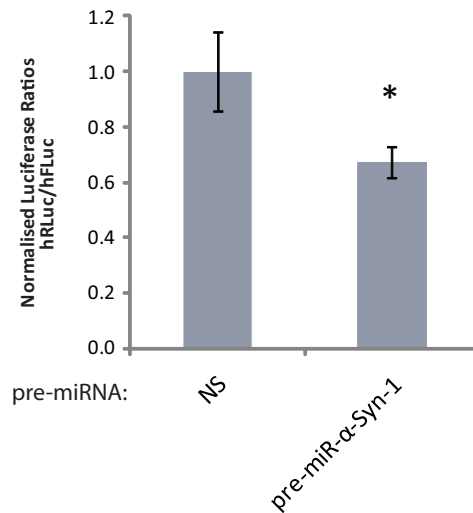

E.

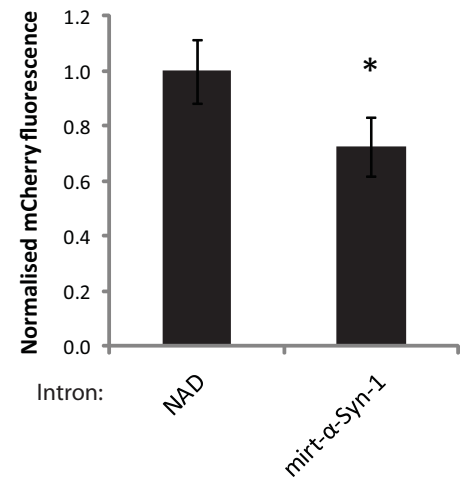

SH-SY5Y cells

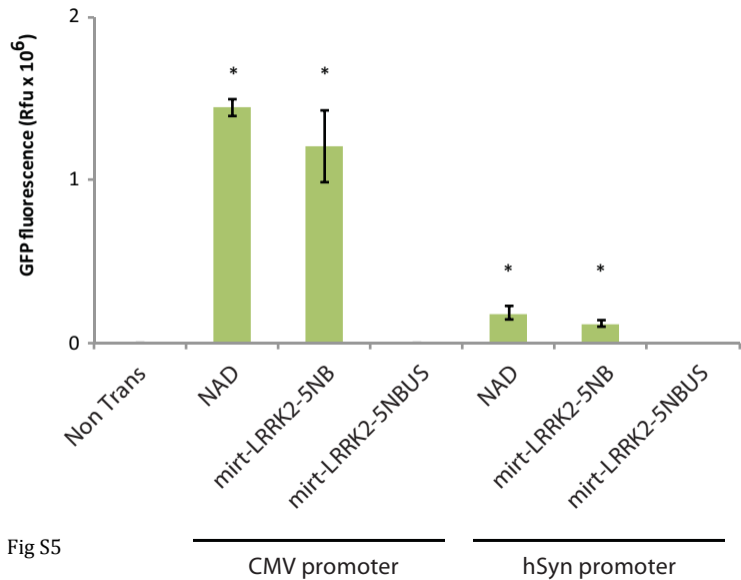

Hela cells

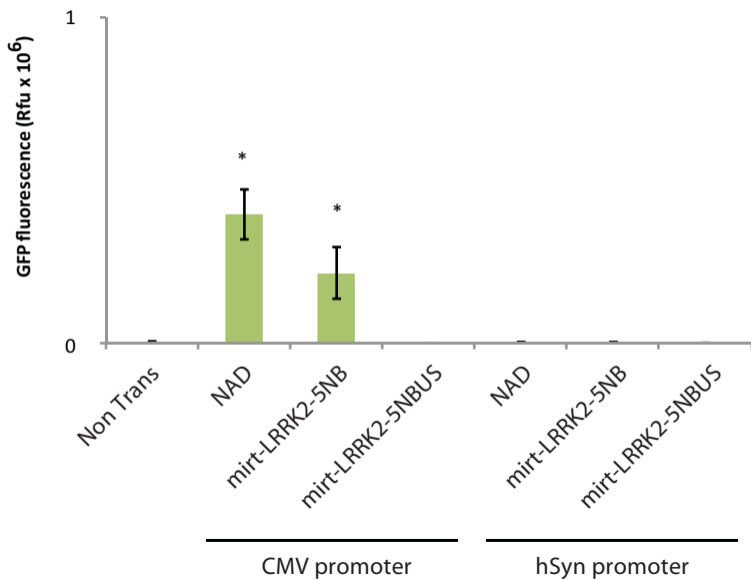

Fig S5
